# Supplementary material for: Barbed suture in neck dissection: a randomized clinical study on efficacy, safety and aesthetic outcome
Source: PubMed Central journal article supplement (PMC11564391; doi:10.1007/s00405-024-08869-6), 2024-08-02

Fig. S2

### Trainees

#### Barbed suture

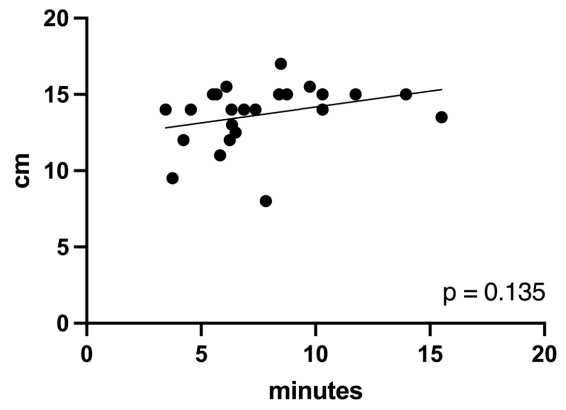

#### Smooth suture

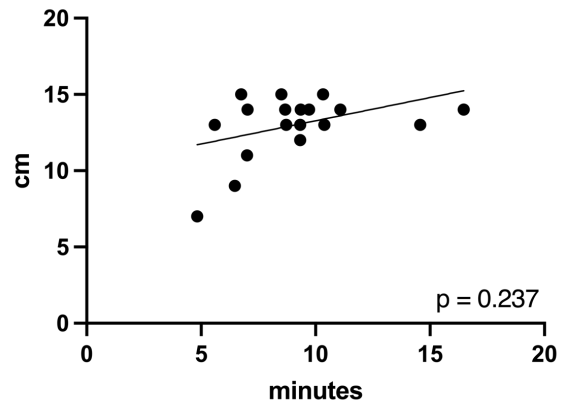

### Consultants

#### Barbed suture

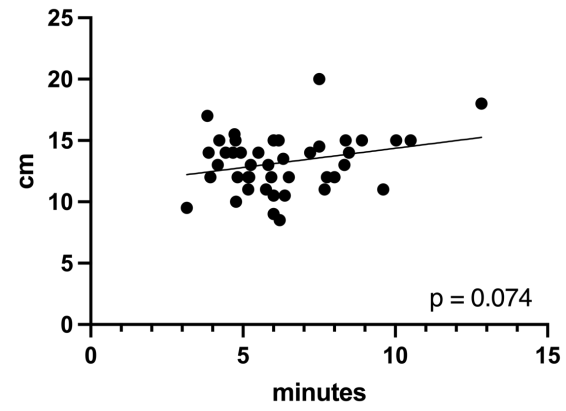

#### Smooth suture

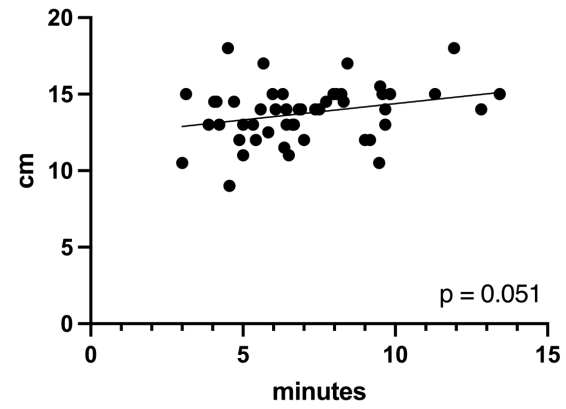

Supplement: 405_2024_8869_MOESM1_ESM.pdf [file 405_2024_8869_MOESM1_ESM.pdf]
